# Supplementary material for: Conventional androgen deprivation therapy is associated with an increased risk of fracture in advanced prostate cancer, a nationwide population-based study
Source: PLoS One. 2023 Jan 4;18(1):e0279981. doi: 10.1371/journal.pone.0279981 (PMC9812325; doi:10.1371/journal.pone.0279981)
Supplement: S2 File — (XLSX) [file pone.0279981.s002.xlsx]

## Sheet: table
Table 1. Clinical characteristics of patients with and without prostate cancer.
Variable	Total n=26642		Control n=13321		With prostate cancer								P-value
					With hormone treatment (injection) n=5020		With Orchiedectomy n=1193		With hormone treatment (oral) n=6059		With Radical prostatectomy n=1049
	n	(%)	n	(%)	n	(%)	n	(%)	n	(%)	n	(%)
Fracture													<0.001
No	24801	-93.1	12439	-93.4	4688	-93.4	1077	-90.3	5576	-92	1021	-97.3
Yes	1841	-6.9	882	-6.6	332	-6.6	116	-9.7	483	-8	28	-2.7
﹢T test; chi-squared test for all other P-values.
Table 3. Adjusted hazard ratio of fracture associated with prostate cancer.
Variable	Control			With hormone treatment (injection)			With Orchiedectomy			With hormone treatment (oral)			With Radical prostatectomy
	Adjusted HR	95% CI	P-value	Adjusted HR	95% CI	P-value	Adjusted HR	95% CI	P-value	Adjusted HR	95% CI	P-value	Adjusted HR	95% CI	P-value
Age, years	1.04	(1.03-1.05)	<0.001	1.02	(1.01-1.04)	0.0029	1.04	(1.01-1.08)	0.0034	1.05	(1.04-1.07)	<0.001	1.12	(1.05-1.19)	0.0006
Myocardial infarction
No	1	─	─	1	─	─	1	─	─	1	─	─	1	─	─
Yes	1.21	(0.71-2.06)	0.4853	0.82	(0.30-2.21)	0.6921	0.53	(0.07-3.83)	0.5306	0.7	(0.31-1.56)	0.3796	─	─	─
Heart failure
No	1	─	─	1	─	─	1	─	─	1	─	─	1	─	─
Yes	1.23	(0.92-1.66)	0.1636	0.98	(0.59-1.64)	0.9525	1.2	(0.58-2.49)	0.6199	1.39	(0.98-1.97)	0.0685	2.48	(0.33-18.91)	0.3795
Peripheral vascular disease
No	1	─	─	1	─	─	1	─	─	1	─	─	1	─	─
Yes	0.83	(0.43-1.61)	0.5885	0.7	(0.22-2.18)	0.5368	1.37	(0.43-4.41)	0.5952	1.12	(0.57-2.17)	0.7476	4	(0.53-30.32)	0.1792
Stroke
No	1	─	─	1	─	─	1	─	─	1	─	─	1	─	─
Yes	1.12	(0.92-1.36)	0.264	1.32	(0.97-1.80)	0.081	1.05	(0.64-1.73)	0.8486	1.08	(0.85-1.37)	0.5442	2.42	(0.90-6.50)	0.0784
Dementia
No	1	─	─	1	─	─	1	─	─	1	─	─	1	─	─
Yes	0.9	(0.57-1.42)	0.6609	1.54	(0.83-2.85)	0.1699	1.17	(0.41-3.30)	0.7696	1.05	(0.59-1.88)	0.8691	─	─	─
Pulmonary disease
No	1	─	─	1	─	─	1	─	─	1	─	─	1	─	─
Yes	1.28	(1.10-1.49)	0.0017	1.2	(0.94-1.53)	0.1356	1.11	(0.73-1.69)	0.6226	1.19	(0.98-1.45)	0.0818	0.94	(0.36-2.50)	0.9092
Connective tissue disorder
No	1	─	─	1	─	─	1	─	─	1	─	─	1	─	─
Yes	1.08	(0.56-2.08)	0.8231	1.18	(0.49-2.85)	0.7181	1.84	(0.57-5.99)	0.3113	1.81	(0.93-3.51)	0.0802	─	─	─
Liver disease
No	1	─	─	1	─	─	1	─	─	1	─	─	1	─	─
Yes	1.05	(0.82-1.35)	0.696	1.14	(0.80-1.61)	0.4754	0.97	(0.51-1.84)	0.9166	1.23	(0.93-1.64)	0.1511	2.64	(1.04-6.69)	0.0404
Diabetes
No	1	─	─	1	─	─	1	─	─	1	─	─	1	─	─
Yes	1.13	(0.94-1.35)	0.1899	1.05	(0.79-1.39)	0.7607	1.98	(1.30-3.00)	0.0013	1	(0.79-1.25)	0.9728	0.71	(0.24-2.13)	0.5469
Paraplegia
No	1	─	─	1	─	─	1	─	─	1	─	─	1	─	─
Yes	1.26	(0.64-2.47)	0.5036	0.72	(0.18-2.95)	0.6517	2.72	(0.36-20.71)	0.3331	0.65	(0.16-2.62)	0.5399	─	─	─
Renal disease
No	1	─	─	1	─	─	1	─	─	1	─	─	1	─	─
Yes	1.39	(1.09-1.77)	0.0087	1.45	(1.02-2.06)	0.0373	1.04	(0.55-1.96)	0.9142	1.28	(0.95-1.72)	0.1085	1.44	(0.33-6.21)	0.6284
Osteoporosis medication
No	1	─	─	1	─	─	1	─	─	1	─	─	1	─	─
Yes	0.36	(0.15-0.86)	0.0218	0.22	(0.14-0.35)	<0.001	0.26	(0.09-0.70)	0.0076	0.34	(0.16-0.72)	0.005	─	─	─
HR was adjusted for all variables in table.
